# Supplementary material
Source: PubMed Central journal article supplement (PMC3690570)
Supplement: NIHMS437549-supplement-01.pdf [file NIHMS437549-supplement-01.pdf]

# Neighborhood Design for Walking and Biking

## Physical Activity and Body Mass Index

Barbara B. Brown, PhD, Ken R. Smith, PhD, Heidi Hanson, MS, Jessie X. Fan, PhD,  
Lori Kowaleski-Jones, PhD, Cathleen D. Zick, PhD

### Appendix A

Weight, control variables, walkability/bikeability, and physical activity: means and simple correlations for the full sample

| Weight outcomes                                        | Women<br>(n=1720) |       | Men<br>(n=1808) |       | Women           |                  | Men             |                  |
|--------------------------------------------------------|-------------------|-------|-----------------|-------|-----------------|------------------|-----------------|------------------|
|                                                        | M                 | SE    | M               | SE    | BMI<br><i>r</i> | MVPA<br><i>r</i> | BMI<br><i>r</i> | MVPA<br><i>r</i> |
| BMI (BMI units)                                        | 28.84             | 0.30  | 28.56           | 0.21  | 1.00            | -0.17            | 1.00            | -0.21            |
| <b>Control variables (in proportions unless noted)</b> |                   |       |                 |       |                 |                  |                 |                  |
| Age (years)                                            | 43.69             | 0.35  | 42.61           | 0.38  | 0.09            | -0.17            | 0.10            | -0.24            |
| Married                                                | 0.67              | 0.02  | 0.76            | 0.02  | -0.09           | 0.04             | 0.06            | 0.00             |
| < high school                                          | 0.12              | 0.01  | 0.14            | 0.01  | 0.02            | 0.08             | -0.05           | 0.04             |
| Some college                                           | 0.35              | 0.01  | 0.31            | 0.01  | 0.09            | -0.06            | 0.03            | -0.04            |
| College graduate                                       | 0.29              | 0.02  | 0.29            | 0.02  | -0.16           | 0.10             | -0.08           | 0.01             |
| Black                                                  | 0.13              | 0.02  | 0.11            | 0.02  | 0.16            | -0.04            | 0.04            | -0.01            |
| Hispanic                                               | 0.11              | 0.01  | 0.12            | 0.01  | 0.01            | 0.03             | -0.02           | 0.14             |
| Other race                                             | 0.06              | 0.01  | 0.05            | 0.01  | -0.13           | -0.02            | -0.07           | -0.09            |
| < poverty level                                        | 0.10              | 0.01  | 0.09            | 0.01  | 0.08            | 0.05             | -0.07           | -0.02            |
| 1-2 times the poverty level                            | 0.17              | 0.01  | 0.16            | 0.01  | 0.02            | -0.01            | -0.04           | 0.09             |
| Calories (100's)                                       | 18.57             | 0.16  | 26.72           | 0.21  | 0.05            | 0.05             | -0.02           | 0.10             |
| Smoker                                                 | 0.21              | 0.01  | 0.26            | 0.01  | -0.06           | -0.02            | -0.11           | -0.07            |
| Device worn (hours/week)                               | 85.03             | 0.53  | 86.98           | 0.60  | -0.08           | 0.13             | -0.07           | 0.05             |
| Income, BG (\$1000's/hh)                               | 53.41             | 10.44 | 53.80           | 10.38 | -0.15           | 0.11             | -0.04           | 0.05             |
| Age, BG (years)                                        | 36.07             | 0.35  | 36.09           | 0.44  | -0.05           | -0.03            | 0.08            | -0.09            |
| Black, BG                                              | 0.12              | 0.01  | 0.11            | 0.01  | 0.14            | -0.06            | -0.01           | -0.02            |
| Hawaiian-Pacific Islander, BG                          | 0.00              | 0.00  | 0.00            | 0.00  | 0.02            | 0.01             | -0.04           | -0.02            |
| Asian, BG                                              | 0.03              | 0.00  | 0.03            | 0.00  | -0.06           | 0.01             | -0.11           | 0.01             |
| Hispanic, BG                                           | 0.10              | 0.01  | 0.10            | 0.01  | 0.01            | 0.00             | -0.06           | 0.07             |
| <b>Walkability/bikeability</b>                         |                   |       |                 |       |                 |                  |                 |                  |
| Density, BG (1000's/square mile)                       | 50.02             | 0.74  | 40.97           | 0.65  | 0.03            | 0.07             | -0.10           | 0.09             |
| Housing age (years), BG                                | 28.97             | 10.00 | 29.48           | 0.92  | 0.03            | 0.04             | -0.05           | 0.03             |
| Walk to work, BG                                       | 0.02              | 0.00  | 0.02            | 0.00  | -0.06           | 0.06             | -0.06           | 0.07             |
| Bike to work, BG                                       | 0.04              | 0.00  | 0.04            | 0.00  | -0.03           | 0.08             | -0.09           | 0.07             |
| <b>Physical activity</b>                               |                   |       |                 |       |                 |                  |                 |                  |
| MVPA (minutes/day)                                     | 20.29             | 0.84  | 33.90           | 0.67  | -0.17           | 10.00            | -0.21           | 10.00            |

Note: Variables are given in proportions, unless otherwise noted. Simple *r*'s >0.046 are significant at *p*<0.05.

BG, block group; hh, household; MVPA, moderate-to-vigorous physical activity

## Appendix B

Weight, controls, walkability/bikeability, and MVPA: means and simple correlations for obese (vs healthy weight) subsample

| Variables (in proportions, unless otherwise noted)     | Women<br>(n=1213) |       | Men<br>(n=1029) |       | Women             |                  | Men               |                  |
|--------------------------------------------------------|-------------------|-------|-----------------|-------|-------------------|------------------|-------------------|------------------|
|                                                        | M                 | SE    | M               | SE    | Obese<br><i>r</i> | MVPA<br><i>r</i> | Obese<br><i>r</i> | MVPA<br><i>r</i> |
| <b>Weight outcomes</b>                                 |                   |       |                 |       |                   |                  |                   |                  |
| BMI (BMI units)                                        | 29.39             | 0.41  | 29.40           | 0.35  | 0.86              | -0.20            | 0.87              | -0.28            |
| Obese (vs healthy weight)                              | 0.49              | 0.02  | 0.56            | 0.03  | 10.00             | -0.20            | 10.00             | -0.26            |
| <b>Control variables (in proportions unless noted)</b> |                   |       |                 |       |                   |                  |                   |                  |
| Age (years)                                            | 43.08             | 0.42  | 41.97           | 0.38  | 0.11              | -0.18            | 0.18              | -0.26            |
| Married                                                | 0.66              | 0.02  | 0.74            | 0.02  | -0.07             | 0.03             | 0.10              | 0.00             |
| < high school                                          | 0.11              | 0.01  | 0.15            | 0.02  | 0.07              | 0.06             | -0.09             | 0.07             |
| Some college                                           | 0.36              | 0.02  | 0.31            | 0.02  | 0.08              | -0.04            | 0.07              | -0.04            |
| College graduate                                       | 0.30              | 0.02  | 0.29            | 0.02  | -0.21             | 0.11             | -0.11             | -0.02            |
| Black                                                  | 0.13              | 0.02  | 0.12            | 0.02  | 0.21              | -0.05            | 0.03              | 0.00             |
| Hispanic                                               | 0.10              | 0.01  | 0.11            | 0.02  | 0.03              | 0.02             | -0.02             | 0.19             |
| Other race                                             | 0.06              | 0.01  | 0.05            | 0.01  | -0.17             | -0.01            | -0.07             | -0.12            |
| < poverty                                              | 0.10              | 0.01  | 0.10            | 0.01  | 0.07              | 0.04             | -0.09             | 0.00             |
| 1-2 times the poverty level                            | 0.17              | 0.01  | 0.17            | 0.01  | 0.04              | -0.02            | -0.08             | 0.09             |
| Calories (100's)                                       | 180.84            | 0.22  | 270.03          | 0.43  | 0.02              | 0.03             | -0.03             | 0.11             |
| Smoker                                                 | 0.21              | 0.02  | 0.28            | 0.01  | -0.08             | 0.01             | -0.15             | -0.02            |
| Device worn (hours/week)                               | 84.36             | 0.63  | 86.60           | 0.80  | -0.09             | 0.15             | -0.06             | 0.10             |
| Income, BG (\$1000's/hh)                               | 54.15             | 10.40 | 52.33           | 10.33 | -0.21             | 0.13             | -0.04             | 0.01             |
| Age (years), BG                                        | 35.95             | 0.33  | 35.96           | 0.41  | -0.04             | -0.03            | 0.15              | -0.12            |
| Black, BG                                              | 0.12              | 0.01  | 0.11            | 0.01  | 0.17              | -0.07            | -0.01             | -0.01            |
| Hawaiian-Pacific Islander, BG                          | 0.0               | 0.0   | 0.0             | 0.0   | 0.01              | 0.02             | -0.06             | 0.04             |
| Asian, BG                                              | 0.03              | 0.0   | 0.03            | 0.0   | -0.10             | 0.01             | -0.13             | -0.00            |
| Hispanic, BG                                           | 0.10              | 0.01  | 0.11            | 0.01  | 0.03              | 0.02             | -0.07             | 0.12             |
| <b>Walkability/bikeability</b>                         |                   |       |                 |       |                   |                  |                   |                  |
| Density, BG (1000's/square mile)                       | 50.07             | 0.71  | 50.05           | 0.60  | 0.03              | 0.06             | -0.14             | 0.10             |
| Housing age (years), BG                                | 29.01             | 10.04 | 30.26           | 0.97  | 0.05              | 0.02             | -0.10             | 0.03             |
| Walk to work, BG                                       | 0.02              | 0.0   | 0.02            | 0.0   | -0.06             | 0.06             | -0.09             | 0.05             |
| Bike to work, BG                                       | 0.04              | 0.0   | 0.04            | 0.0   | -0.06             | 0.07             | -0.13             | 0.04             |
| <b>Physical activity</b>                               |                   |       |                 |       |                   |                  |                   |                  |
| MVPA (minutes/day)                                     | 20.39             | 0.95  | 32.36           | 0.93  | -0.20             | 10.00            | -0.26             | 10.00            |

Note: Simple *r*'s >0.056 are significant at *p*<0.050.

BG, block group; hh, household; MVPA, moderate-to-vigorous physical activity
